# Supplementary material for: “Medium-ring” strategy enables high-performance narrowband pure-blue multi-resonance emitters: boost provided by a unique perpendicular geometry
Source: Royal Society of Chemistry journal article supplement (doi:10.1039/d3cc01235b), 2023-01-01

## ***Supporting Information***

### **“Medium-Ring” Strategy Enables High-Performance Narrowband Pure-Blue Multi-Resonance Emitters: Boosted by a Unique Perpendicular Geometry<sup>†</sup>**

*Xin Xiao<sup>†</sup>, Bowen Lei<sup>†</sup>, Di Wu,\* Zhengyang Bin\**

*<sup>†</sup> These authors contribute equally to the work.*

*Key Laboratory of Green Chemistry and Technology of Ministry of Education,  
College of Chemistry, Sichuan University, 29 Wangjiang Road, Chengdu 610064,  
People's Republic of China*

*\*Correspondence to: wood@scu.edu.cn; binzhengyang@scu.edu.cn*

## Table of contents

|                                                 |    |
|-------------------------------------------------|----|
| I. General Remarks .....                        | 3  |
| II. OLED Fabrication and Characterization ..... | 3  |
| III. Synthesis and Characterization .....       | 4  |
| IV. Crystal Data.....                           | 8  |
| V. Additional Spectra and Data .....            | 9  |
| VI. Copies of NMR spectra .....                 | 13 |

## I. General Remarks

All commercially available reagents and chemicals were used as received without further purification. Unless otherwise noted, all reactions were carried out using Schlenk techniques under a nitrogen atmosphere. The solvents were dried and purified using an Innovative Technology PS-MD-5 Solvent Purification System. NMR spectra were obtained on an Agilent 400-MR DD2 spectrometer. The  $^1\text{H}$  NMR (400 MHz) chemical shifts were measured relative to  $\text{CDCl}_3$  as the internal reference ( $\text{CDCl}_3$ :  $\delta = 7.26$  ppm). The  $^{13}\text{C}$  NMR (100 MHz) chemical shifts were given using  $\text{CDCl}_3$  as the internal standard ( $\text{CDCl}_3$ :  $\delta = 77.16$  ppm). High-resolution mass spectra (HRMS) were obtained with a Shimadzu LCMS-IT-TOF (ESI). X-Ray single-crystal diffraction data were collected on a Bruker D8 VENTURE single crystal diffraction. UV-vis spectra were measured on a HITACHI U-2910. Fluorescence spectra and photoluminescence quantum yields were collected on a Horiba Jobin Yvon-Edison Fluoromax-3 fluorescence spectrometer with a calibrated integrating sphere system. Phosphorescence spectra were collected on a HITACHI F-7100 fluorescence spectrophotometer and a Horiba Jobin Yvon-Edison Fluoromax-3 fluorescence spectrometer. Transient photoluminescence decay spectra were obtained with Horiba Single Photon Counting Controller: FluoroHub and Horiba TBX Picosecond Photon Detection. Thermogravimetric analysis (TGA) was carried out using DTG-60(H) at a rate of  $10\text{ }^\circ\text{C}/\text{min}$  under nitrogen atmosphere. Cyclic voltammogram were performed on LK2005A with a solution of tetrabutylammonium hexafluorophosphate ( $\text{Bu}_4\text{NPF}_6$ , 0.1 M) in DCM as electrolyte and ferrocene/ferrocenium ( $\text{Fc}/\text{Fc}^+$ ) as standard. Three-electrode system ( $\text{Ag}/\text{Ag}^+$ , platinum wire and glassy carbon electrode as reference, counter and work electrode respectively) was used in the CV measurement.

## II. OLED Fabrication and Characterization

Indium-tin-oxide (ITO) coated glass with a sheet resistance of  $15\text{ }\Omega\text{ sq}^{-1}$  was used as the anode substrate. Prior to film deposition, patterned ITO substrates were cleaned

with alkaline detergent, boiled deionized water, and deionized water thoroughly in ultrasonic bath, dried in an oven, and finally treated with oxygen plasma for 10 min to enhance the surface work function of ITO anode. The organic layers were deposited with the rate of  $0.1 \text{ nm} \cdot \text{s}^{-1}$  under high vacuum. The doped and co-doped layers were prepared by co-evaporating dopant and host material from two individual sources, and the doping concentrations were modulated by controlling the evaporation rates of dopant.

Current density-voltage-Luminance (J-V-L) characteristics were measured by using KEYSIGHT B1500A. The luminance and EL spectra were collected with model DLM-100Z photometer and OPT2000 spectrophotometer, respectively.

### III. Synthesis and Characterization

**Scheme S1.** Synthetic routes to BCz-BN and TBA-BCz-BN.

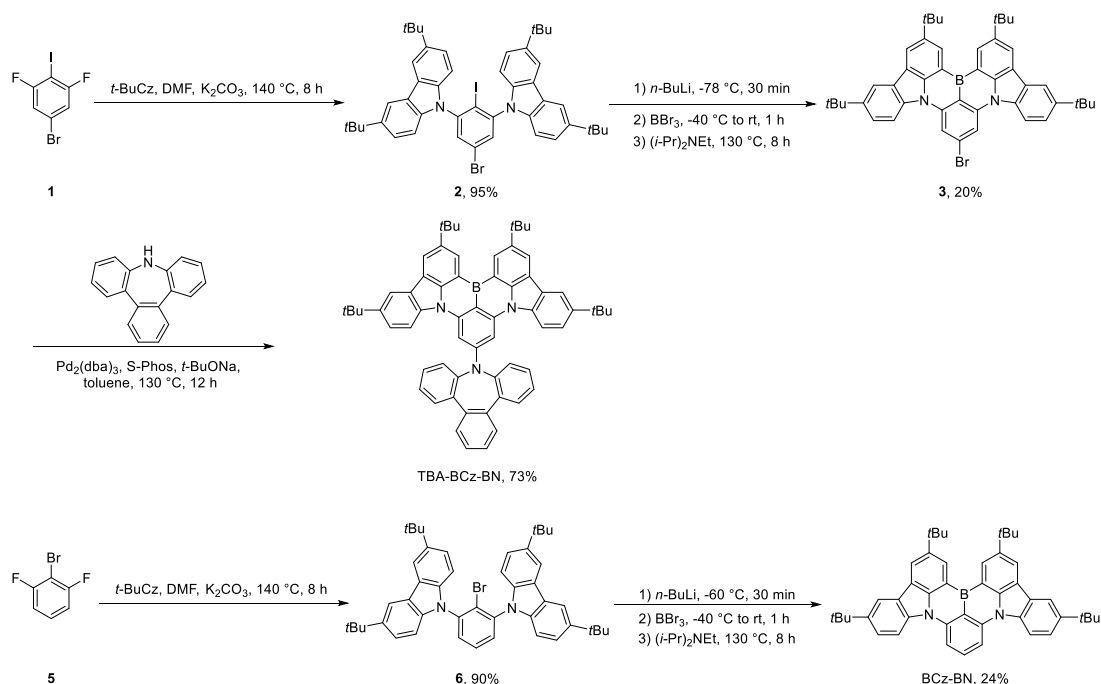

**Synthesis of 2 (BCz-I-Br, 9,9'-(5-bromo-2-iodo-1,3-phenylene)bis(3,6-di-*tert*-butyl-9*H*-carbazole)):** A dried round bottom flask with a magnetic stir bar was charged with 3,6-di-*tert*-butyl-9*H*-carbazole (6.14 g, 22.0 mmol), K<sub>2</sub>CO<sub>3</sub> (6.07 g, 44.0 mmol),

5-bromo-1,3-difluoro-2-iodobenzene (3.12 g, 10.0 mmol) and DMF (*N,N*-dimethylformamide) 100 mL under an air atmosphere. After stirring for 10 min under room temperature, the reaction mixture was allowed to warm to 140 °C and stirred for 8 h. After cooling to room temperature, the solution was filtered through a celite pad and washed with dichloromethane. The filtrate was evaporated under reduced pressure and the residue was purified by column chromatography on silica gel (petroleum ether/dichloromethane = 20:1, v/v) to provide **2** as white solid in 95% yield (7.9 g, 9.5 mmol). <sup>1</sup>H NMR (CDCl<sub>3</sub>, 400 MHz):  $\delta$  = 1.50 (s, 36H), 7.13 (d,  $J$  = 8.8 Hz, 4H), 7.54 (dd,  $J_1$  = 8.4 Hz,  $J_2$  = 1.6 Hz, 4H), 7.70 (s, 2H), 8.18 (d,  $J$  = 1.6 Hz, 4H) ppm. <sup>13</sup>C NMR (100 MHz, CDCl<sub>3</sub>):  $\delta$  = 32.2, 35.0, 104.3, 109.2, 116.1, 122.7, 123.7, 124.5, 133.1, 139.1, 143.6, 144.8 ppm. HRMS (ESI<sup>+</sup>): calcd for C<sub>46</sub>H<sub>51</sub><sup>79</sup>BrIN<sub>2</sub><sup>+</sup> [M+H]<sup>+</sup>, 837.2275, found 837.2273; calcd for C<sub>46</sub>H<sub>51</sub><sup>81</sup>BrIN<sub>2</sub><sup>+</sup> [M+H]<sup>+</sup>, 839.2254, found 839.2252.

**Synthesis of 3 (BCz-BN-Br):** In a dried round bottom flask with a magnetic stir bar, a solution of *n*-BuLi in hexane (2.2 mL, 2.5 M, 5.5 mmol) was added slowly to a solution of **2** (4.2 g, 5.0 mmol) in toluene (100 mL) at -78 °C under a nitrogen atmosphere. After stirring for 1.0 h the reaction mixture was allowed to warm to -40 °C. After addition of boron tribromide (0.71 mL, 7.5 mmol), the reaction mixture was stirred at room temperature for 1.0 h. *N, N*-Diisopropylethylamine (3.5 mL, 20.0 mmol) was added at 0 °C and then the reaction mixture was allowed to warm to 130 °C. After stirring for 8 h, the reaction mixture was cooled to room temperature. The solution was filtered through a celite pad and washed with dichloromethane. The filtrate was evaporated under reduced pressure and the residue was purified by column chromatography on silica gel (petroleum ether/dichloromethane = 10:1, v/v) to provide **3** as yellow powder in 20% yield (720.0 mg, 1.0 mmol). <sup>1</sup>H NMR (400 MHz, CDCl<sub>3</sub>):  $\delta$  = 1.53 (s, 18H), 1.67 (s, 18H), 7.61 (dd,  $J_1$  = 8.8 Hz,  $J_2$  = 2.0 Hz, 2H), 8.15-8.18 (m, 4H), 8.23 (s, 2H), 8.39 (d,  $J$  = 1.6 Hz, 2H), 9.02 (d,  $J$  = 2.0 Hz, 2H) ppm. <sup>13</sup>C NMR (100 MHz, CDCl<sub>3</sub>):  $\delta$  = 32.0, 32.3, 34.9, 35.3, 110.9, 114.2, 117.4, 121.0, 123.3, 124.6, 126.5, 127.8, 129.8, 138.6,

140.4, 143.8, 145.0, 145.7 ppm. HRMS (ESI<sup>+</sup>): calcd for C<sub>46</sub>H<sub>49</sub>B<sup>79</sup>BrN<sub>2</sub> [M+H]<sup>+</sup> 719.3167, found 719.3165; calcd for C<sub>46</sub>H<sub>49</sub>B<sup>81</sup>BrN<sub>2</sub> [M+H]<sup>+</sup> 721.3146, found 721.3147.

**Synthesis of 4 (TBA-BCz-BN):** A dried round bottom flask with a magnetic stir bar was charged with Pd<sub>2</sub>(dba)<sub>3</sub> (18.3 mg, 0.02 mmol), S-Phos (24.7 mg, 0.06 mmol), *t*-BuONa (76.8 mg, 0.8 mmol), **3** (287.2 mg, 0.4 mmol), 9*H*-tribenzo[*b,d,f*]azepine (121.5 mg, 0.5 mmol) (TBA). After being evacuated and backfilled with nitrogen (3 times), toluene (10 mL) was added under N<sub>2</sub> atmosphere. The reaction mixture was stirred at 130 °C for 12 h. After being cooled down to room temperature, the solution was filtered through a celite pad and washed with dichloromethane. The filtrate was evaporated under reduced pressure and the residue was purified by column chromatography on silica gel (petroleum ether/dichloromethane = 5:1, v/v) to provide compound **4** as yellow powder in 73% yield (255.7 mg, 0.29 mmol). <sup>1</sup>H NMR (400 MHz, CDCl<sub>3</sub>): δ = 1.53 (s, 18H), 1.65 (s, 18H), 7.32-7.34 (m, 2H), 7.39 (d, *J* = 8.8 Hz, 2H), 7.46 (s, 2H), 7.63-7.71 (m, 6H), 7.76 (t, *J* = 8.0 Hz, 2H), 7.86 (d, *J* = 8.0 Hz, 2H), 7.94 (d, *J* = 7.6 Hz, 2H), 8.21 (s, 2H), 8.36 (s, 2H), 9.03 (s, 2H) ppm. <sup>13</sup>C NMR (100 MHz, CDCl<sub>3</sub>): δ = 32.0, 32.3, 34.9, 35.2, 93.4, 112.7, 117.3, 119.1, 122.7, 123.9, 127.2, 128.2, 128.4, 128.8, 129.4, 129.7, 129.9, 131.5, 137.3, 138.2, 139.3, 141.8, 144.3, 144.8, 145.4, 145.5, 152.0 ppm. HRMS (ESI<sup>+</sup>): calcd for C<sub>64</sub>H<sub>61</sub>BN<sub>3</sub><sup>+</sup> [M+H]<sup>+</sup> 882.4959, found 882.4953.

**Synthesis of 6 (BCz-Br, (9,9'-(2-bromo-1,3-phenylene)bis(3,6-di-*tert*-butyl-9*H*-carbazole)):** A dried round bottom flask with a magnetic stir bar was charged with 3,6-di-*tert*-butyl-9*H*-carbazole (8.37 g, 30.0 mmol), K<sub>2</sub>CO<sub>3</sub> (8.28 g, 60.0 mmol), 2-bromo-1,3-difluorobenzene (1.93 g, 10.0 mmol) and DMF 150 mL under an air atmosphere. After stirring for 10 min under room temperature, the reaction mixture was allowed to warm to 140 °C and stirred for 8 h. After cooling to room temperature, the solution was filtered through a celite pad and washed with dichloromethane. The filtrate was evaporated under reduced pressure and the residue was purified by column chromatography on silica gel (petroleum

ether/dichloromethane = 10:1, v/v) to provide **6** as a white solid in 90% yield (6.4 g, 9.0 mmol).  $^1\text{H}$  NMR (400 MHz,  $\text{CDCl}_3$ ):  $\delta$  = 1.48 (s, 36H), 7.12 (d,  $J$  = 8.8 Hz, 4H), 7.51 (d,  $J$  = 8.4 Hz, 4H), 7.62 (d,  $J$  = 8.0 Hz, 2H), 7.68 (t,  $J$  = 8.8 Hz, 1H), 8.17 (s, 4H) ppm.  $^{13}\text{C}$  NMR (100 MHz,  $\text{CDCl}_3$ ):  $\delta$  = 32.2, 34.9, 109.5, 116.6, 123.5, 123.9, 125.9, 129.4, 131.0, 139.3, 139.7, 143.2 ppm. HRMS ( $\text{ESI}^+$ ): calcd for  $\text{C}_{46}\text{H}_{51}^{79}\text{BrN}_2\text{Na}^+ [\text{M}+\text{Na}]^+$  733.3128, found 733.3130;  $\text{C}_{46}\text{H}_{51}^{81}\text{BrN}_2\text{Na}^+ [\text{M}+\text{Na}]^+$  735.3107, found 735.3108.

**Synthesis of 7 (BCz-BN):** In a dried round bottom flask with a magnetic stir bar, a solution of *n*-BuLi in hexane (4.0 mL, 2.5 M, 10.0 mmol) was added slowly to a solution of **6** (6.4 g, 9.0 mmol) in toluene (100 mL) at  $-60\text{ }^\circ\text{C}$  under a nitrogen atmosphere. After stirring for 1.0 h at  $-60\text{ }^\circ\text{C}$ , the reaction mixture was allowed to warm to  $-40\text{ }^\circ\text{C}$ . After addition of boron tribromide (1.29 mL, 13.5 mmol), the reaction mixture was stirred at room temperature for 1.0 h. *N,N*-Diisopropylethylamine (6.3 mL, 36.0 mmol) was added at  $0\text{ }^\circ\text{C}$  and then the reaction mixture was allowed to warm to  $130\text{ }^\circ\text{C}$ . After stirring for 12 h, the reaction mixture was cooled to room temperature. The solution was filtered through a celite pad and washed with dichloromethane. The filtrate was evaporated under reduced pressure and the residue was purified by column chromatography on silica gel (petroleum ether/dichloromethane = 20:1, v/v) to provide a bright yellow solid in 24% yield (1.39 g, 2.2 mmol).  $^1\text{H}$  NMR (400 MHz,  $\text{CDCl}_3$ ):  $\delta$  = 1.54 (s, 18H), 1.68 (s, 18H), 7.65 (dd,  $J_1$  = 8.8 Hz,  $J_2$  = 2 Hz, 2H), 7.99 (t,  $J$  = 8 Hz, 1H), 8.26 (d,  $J$  = 2 Hz, 2H), 8.31 (d,  $J$  = 8 Hz, 2H), 8.39 (d,  $J$  = 8.8 Hz, 2H), 8.47 (d,  $J$  = 1.6 Hz, 2H), 9.13 (d,  $J$  = 1.6 Hz, 2H) ppm.  $^{13}\text{C}$  NMR (100 MHz,  $\text{CDCl}_3$ ):  $\delta$  = 32.0, 32.4, 34.9, 35.3, 108.1, 114.2, 117.4, 120.8, 123.7, 124.5, 127.2, 129.9, 133.1, 138.5, 141.7, 144.4, 144.7, 145.4 ppm. HRMS ( $\text{ESI}^+$ ): calcd for  $\text{C}_{46}\text{H}_{50}\text{BN}_2^+ [\text{M}+\text{H}]^+$  641.4062, found 641.4061.

## IV. Crystal Data

**Table S1.** Crystal Data for TBA-BCz-BN (CCDC: 2247576)

|                                             |                                                                 |
|---------------------------------------------|-----------------------------------------------------------------|
| Identification code                         | TBA-BCz-BN                                                      |
| Empirical formula                           | C <sub>65</sub> H <sub>61</sub> BCl <sub>3</sub> N <sub>3</sub> |
| Formula weight                              | 1001.32                                                         |
| Temperature/K                               | 231.0                                                           |
| Crystal system                              | monoclinic                                                      |
| Space group                                 | P2 <sub>1</sub> /n                                              |
| a/Å                                         | 15.1246(12)                                                     |
| b/Å                                         | 15.3418(9)                                                      |
| c/Å                                         | 23.6578(18)                                                     |
| $\alpha$ /°                                 | 90                                                              |
| $\beta$ /°                                  | 99.404(3)                                                       |
| $\gamma$ /°                                 | 90                                                              |
| Volume/Å <sup>3</sup>                       | 5415.7(7)                                                       |
| Z                                           | 4                                                               |
| $\rho_{\text{calc}}/\text{cm}^3$            | 1.228                                                           |
| $\mu/\text{mm}^{-1}$                        | 0.213                                                           |
| F(000)                                      | 2112.0                                                          |
| Crystal size/mm <sup>3</sup>                | 0.38 × 0.36 × 0.29                                              |
| Radiation                                   | MoK $\alpha$ ( $\lambda$ = 0.71073)                             |
| 2 $\Theta$ range for data collection/°      | 4.37 to 49.998                                                  |
| Index ranges                                | -17 ≤ h ≤ 17, -16 ≤ k ≤ 18, -28 ≤ l ≤ 28                        |
| Reflections collected                       | 29947                                                           |
| Independent reflections                     | 9482 [R <sub>int</sub> = 0.0552, R <sub>sigma</sub> = 0.0541]   |
| Data/restraints/parameters                  | 9482/10/682                                                     |
| Goodness-of-fit on F <sup>2</sup>           | 1.017                                                           |
| Final R indexes [I ≥ 2 $\sigma$ (I)]        | R <sub>1</sub> = 0.0696, wR <sub>2</sub> = 0.1783               |
| Final R indexes [all data]                  | R <sub>1</sub> = 0.1001, wR <sub>2</sub> = 0.2068               |
| Largest diff. peak/hole / e Å <sup>-3</sup> | 0.64/-0.92                                                      |

## V. Additional Spectra and Data

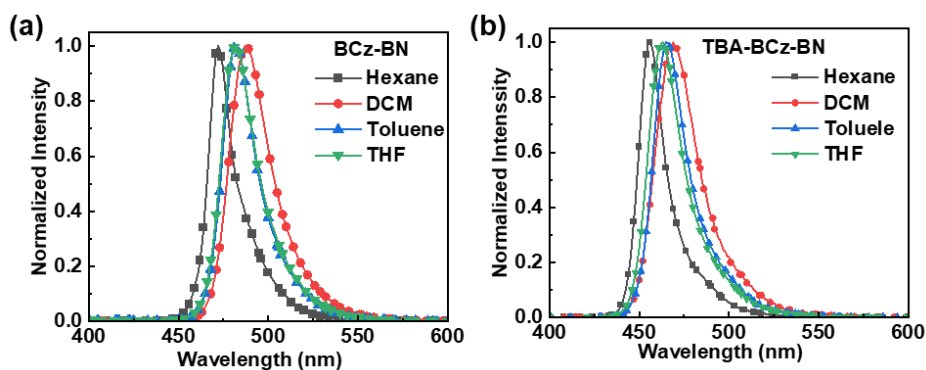

**Figure S1.** Photoluminescence spectra measured in different polar solvents ( $1.0 \times 10^{-5}$  M, 298 K) of (a) BCz-BN and (b) TBA-BCz-BN.

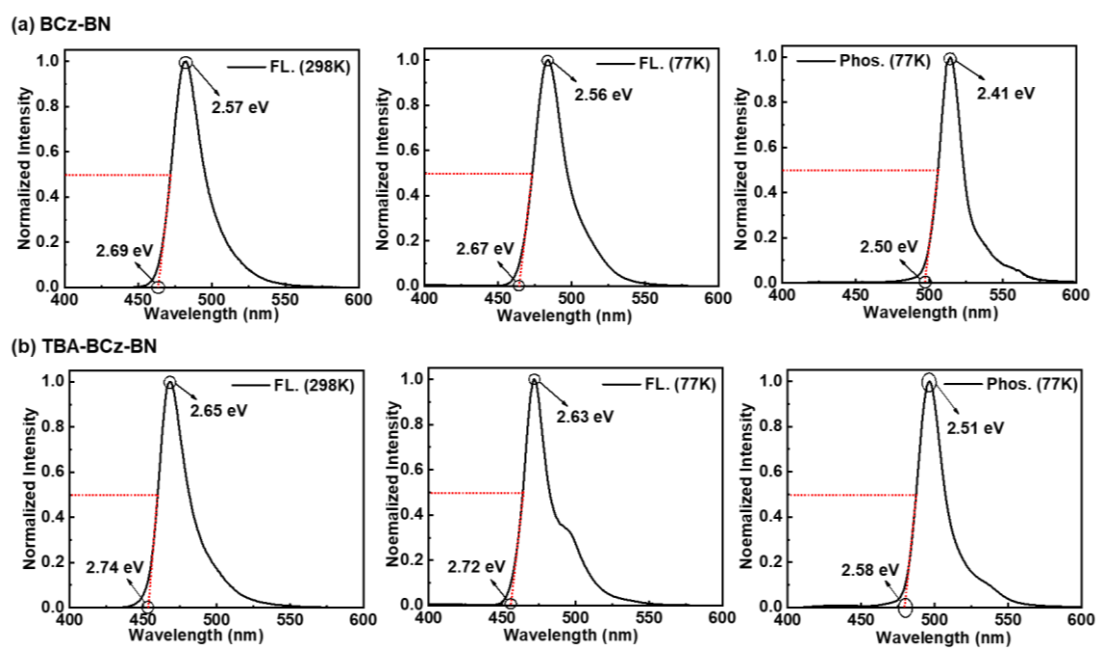

**Figure S2.** The singlet energy ( $E_{S1}$ ) values and triplet energy ( $E_{T1}$ ) values measured by the onset wavelengths and peaks of the FL.(at 298K and 77K) and Phos.(77K) spectra for (a) BCz-BN and (b) TBA-BCz-BN.

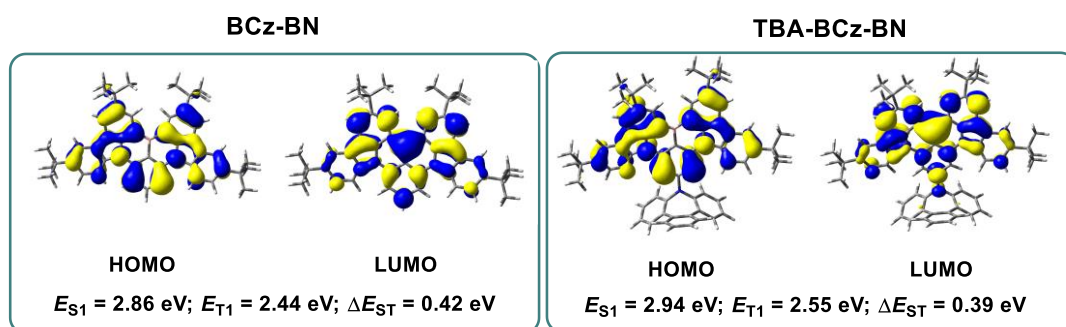

**Figure S3.** Theoretical calculation results of the FMOs distributions and energy level alignments of (a) BCz-BN and (b) TBA-BCz-BN.

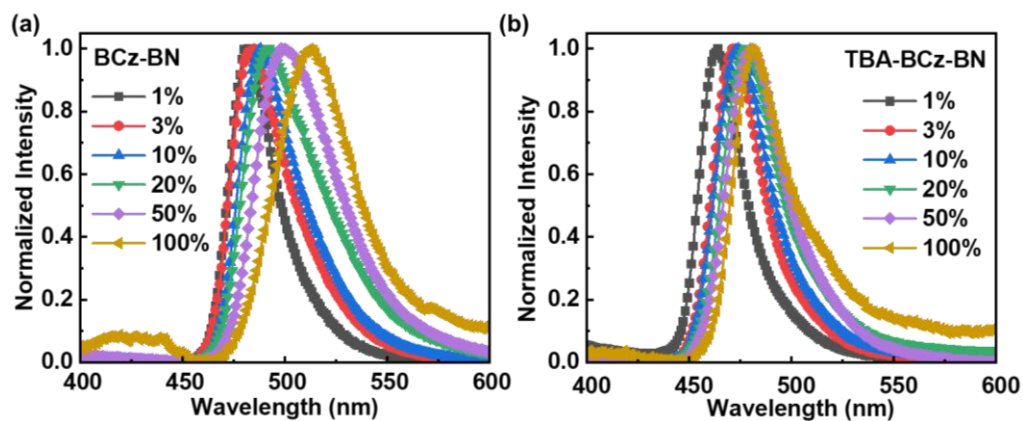

**Figure S4.** Normalized photoluminescence spectra of (a) BCz-BN and (b) TBA-BCz-BN in mCBP host at different concentrations.

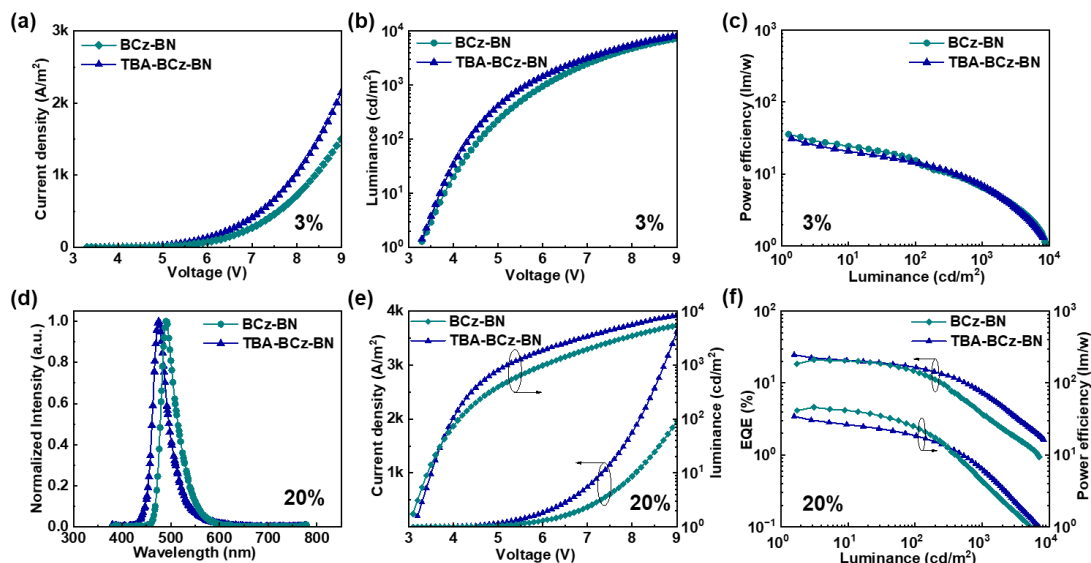

**Figure S5.** EL performances of OLEDs with the emitter at different doping concentrations. (a) Current density versus voltage curves, (b) luminance versus voltage curves and (c) power efficiency versus luminance curves of 3% BCz-BN- and TBA-BCz-BN-based OLEDs. (d) EL spectra versus wavelength curves, (e) current density and luminance versus voltage curves and (f) EQE and power efficiency versus luminance curves of 20% BCz-BN- and TBA-BCz-BN-based OLEDs.

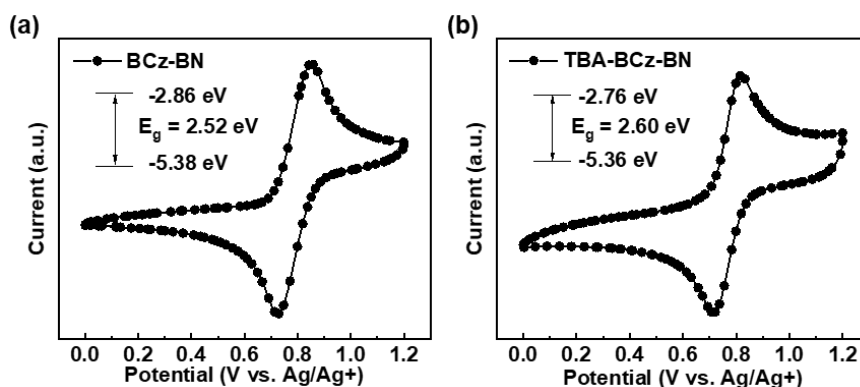

**Figure S6.** Cyclic voltammograms of (a) BCz-BN and (b) TBA-BCz-BN measured in dry dichloromethane containing 0.1 M of tetrabutylammonium hexafluorophosphate.

**Table S2.** Summary of photophysical properties for BCz-BN and TBA-BCz-BN in mCBP doped films.

| Emitter    | doping ratio<br>[x wt%] | $\lambda$<br>[nm] | FWHM<br>[nm] | PLQY<br>[%] |
|------------|-------------------------|-------------------|--------------|-------------|
| TBA-BCz-BN | 1                       | 464               | 25           | 95          |
|            | 3                       | 472               | 28           | 86          |
|            | 10                      | 474               | 31           | 78          |
|            | 20                      | 478               | 33           | 61          |
|            | 50                      | 480               | 34           | 51          |
|            | 100                     | 480               | 34           | 39          |
| BCz-BN     | 1                       | 482               | 27           | 91          |
|            | 3                       | 485               | 33           | 86          |
|            | 10                      | 488               | 35           | 65          |
|            | 20                      | 492               | 43           | 56          |
|            | 50                      | 498               | 46           | 42          |
|            | 100                     | 512               | 46           | 34          |

**Table S3.** EL performances of 20% BCz-BN- and TBA-BCz-BN-based OLEDs.

| Emitter    | EL <sub>peak</sub><br>[nm] | V <sub>on</sub> <sup>a</sup><br>[V] | FWHM<br>[nm] | EQE <sub>max/100/1000</sub> <sup>b</sup><br>[%] | PE <sub>max/100/1000</sub> <sup>c</sup><br>[lm W <sup>-1</sup> ] | CIE <sup>d</sup><br>[x, y] |
|------------|----------------------------|-------------------------------------|--------------|-------------------------------------------------|------------------------------------------------------------------|----------------------------|
| BCz-BN     | 490                        | 3.1                                 | 36           | 18.4%/13.8%/3.5%                                | 41.6/23.0/4.1                                                    | [0.12,0.48]                |
| TBA-BCz-BN | 475                        | 3.2                                 | 34           | 24.7%/16.5%/7.5%                                | 34.5/18.4/6.5                                                    | [0.13,0.22]                |

<sup>a</sup>Turn-on voltage. <sup>b</sup>External quantum efficiency of maximum/at 100 cd m<sup>-2</sup>/1000 cd m<sup>-2</sup>. <sup>c</sup>Power efficiency of maximum/at 100 cd m<sup>-2</sup>/1000 cd m<sup>-2</sup>. <sup>d</sup>Commission Internationale de l'Eclairage (CIE) coordinates.

<sup>1</sup>H NMR spectrum of **2** (CDCl<sub>3</sub>)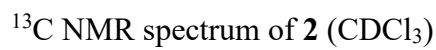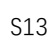

<sup>1</sup>H NMR spectrum of compound 10 in CDCl<sub>3</sub>. The spectrum shows peaks from 1.5 to 9.1 ppm. Integration values are provided below the peaks: 2.00, 2.04, 2.01, 4.02, 2.00, 18.03, and 18.01. The chemical structure of compound 10 is shown in the top right corner.

**Chemical structure of compound 10:**

CC(C)(C)c1ccc2c(c1)c3c4c5ccc(C(C)(C)C)cc5n3c6c7c8ccc(C(C)(C)C)cc8n6c9c(Br)ccc(C(C)(C)C)c92

**<sup>13</sup>C NMR spectrum (CDCl<sub>3</sub>) of compound 10:**

| Chemical Shift (ppm) |
|----------------------|
| 145.74               |
| 145.00               |
| 143.76               |
| 140.38               |
| 138.63               |
| 129.82               |
| 127.81               |
| 126.49               |
| 124.61               |
| 123.26               |
| 120.95               |
| 117.38               |
| 114.15               |
| 110.90               |
| 77.48                |
| 77.16                |
| 76.84                |
| 35.32                |
| 34.94                |
| 32.31                |
| 31.96                |

# <sup>1</sup>H NMR spectrum of TBA-BCz-BN (CDCl<sub>3</sub>)

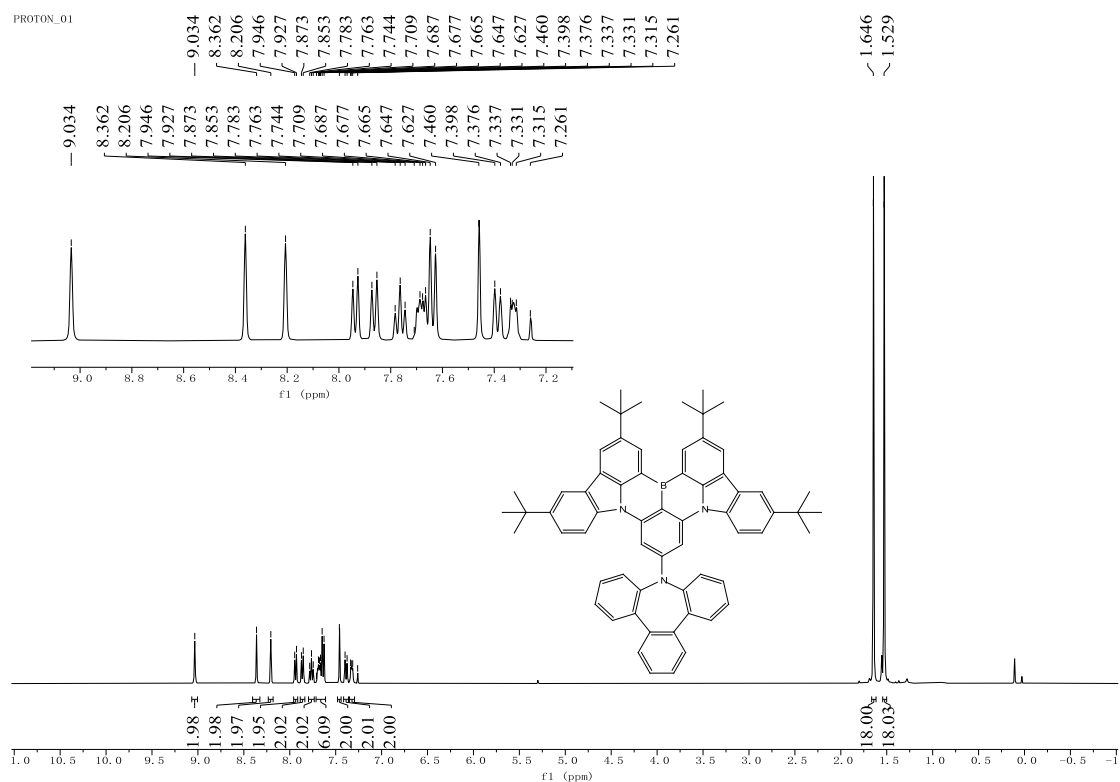

# <sup>13</sup>C NMR spectrum of TBA-BCz-BN (CDCl<sub>3</sub>)

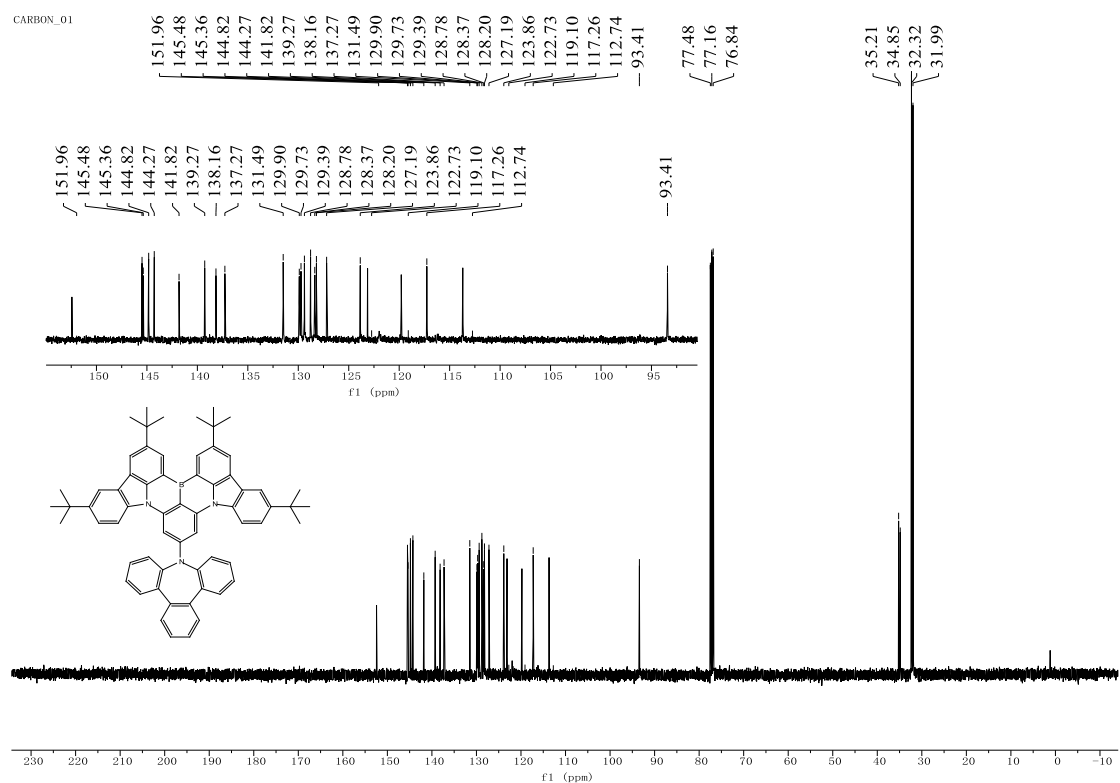

$^1\text{H}$  NMR spectrum of **5** ( $\text{CDCl}_3$ )

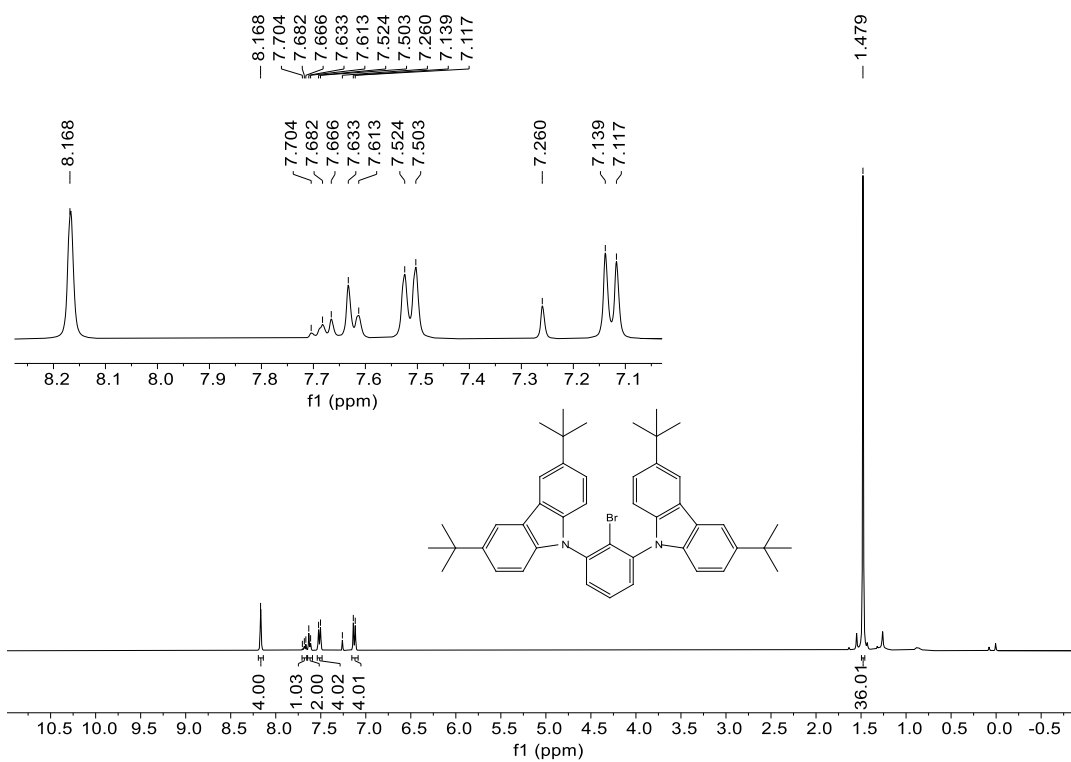

$^{13}\text{C}$  NMR spectrum of **5** ( $\text{CDCl}_3$ )

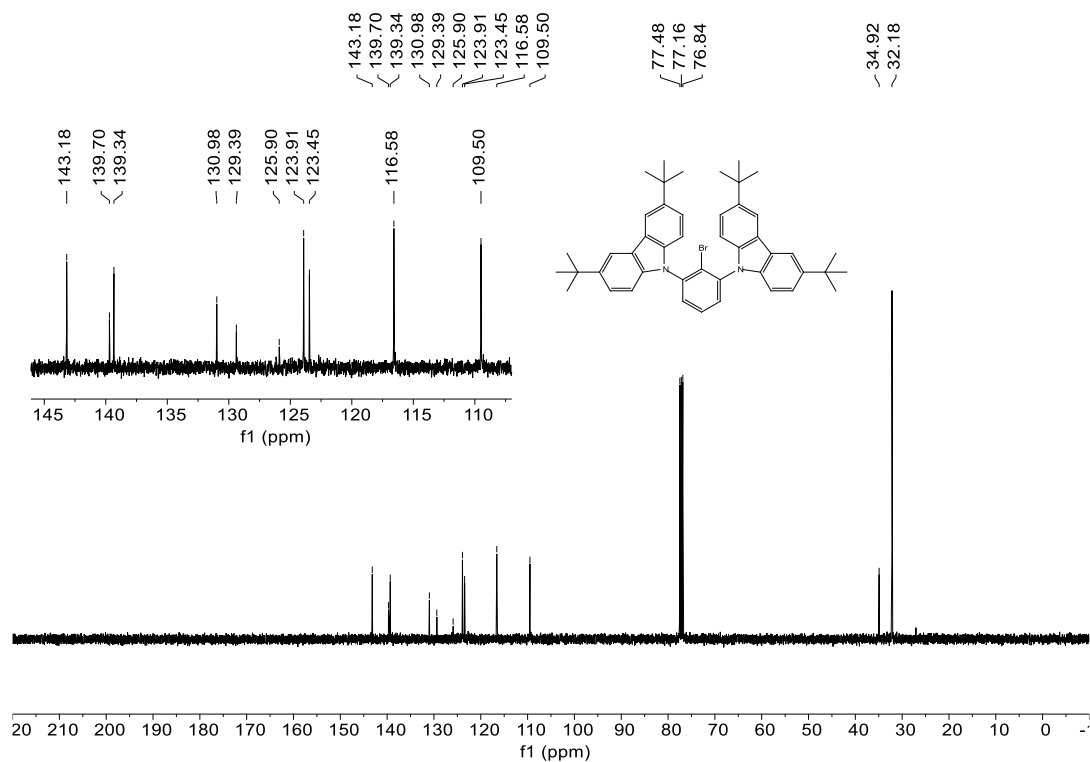

# <sup>1</sup>H NMR spectrum of BCz-BN (CDCl<sub>3</sub>)

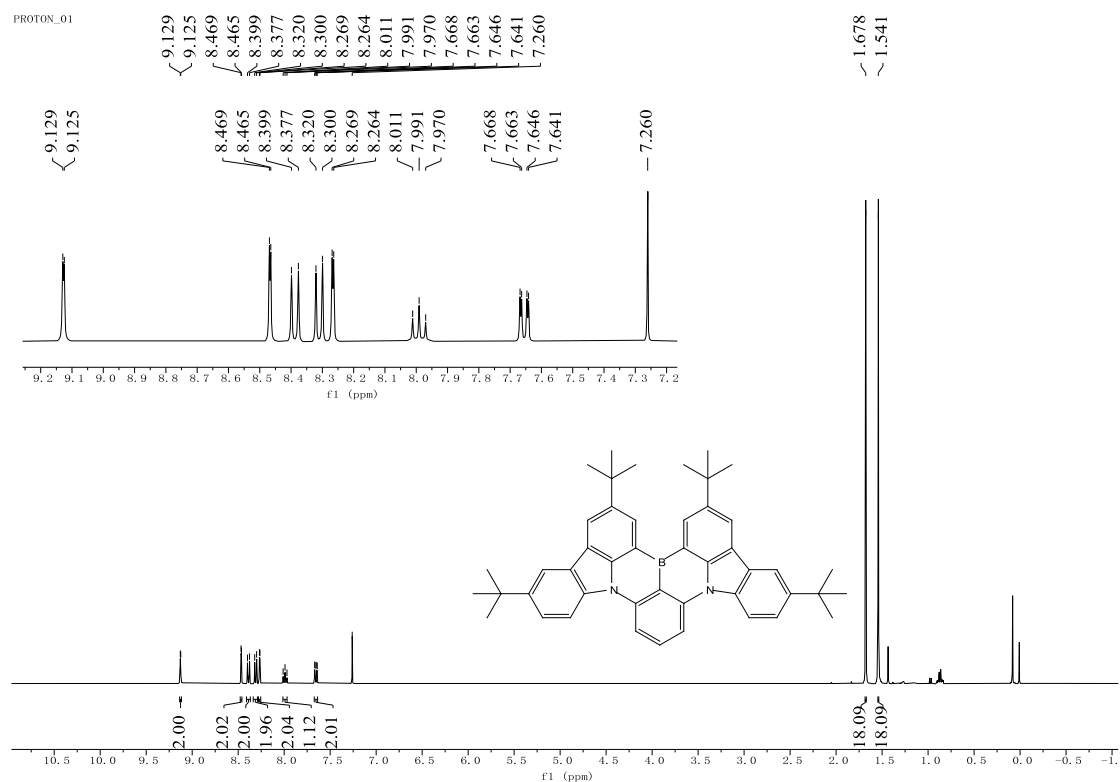

# <sup>13</sup>C NMR spectrum of BCz-BN (CDCl<sub>3</sub>)

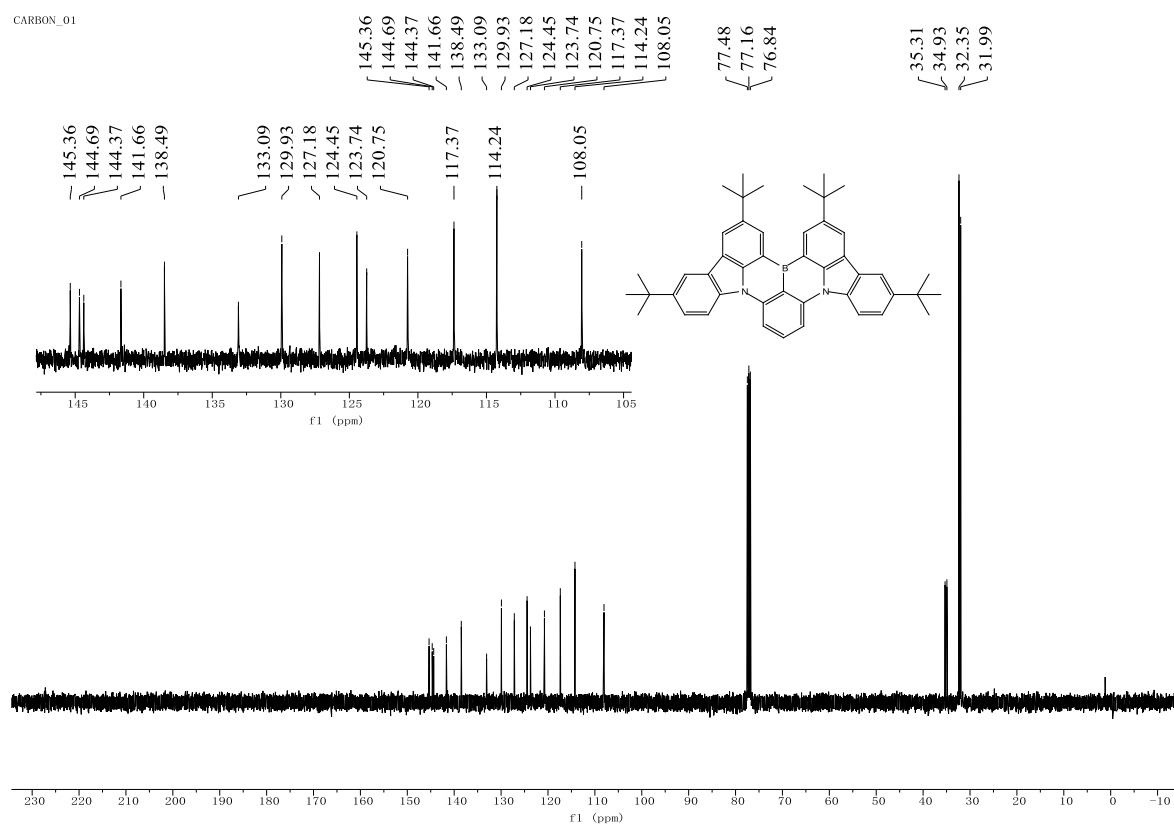

Supplement: d3cc01235b1.pdf [file d3cc01235b1.pdf]
